# Supplementary material for: A radical rebound mechanism for the methane oxidation reaction promoted by the dicopper center of a pMMO enzyme: a computational perspective
Source: Royal Society of Chemistry journal article supplement (doi:10.1039/c5dt02638e), 2015-10-30
Supplement: c5dt02638e1.pdf [file c5dt02638e1.pdf]

## Support Information

### A Radical Rebound Mechanism to Methane Oxidation Reaction Promoted by the Dicopper Center of pMMO Enzyme: A Computational Perspective.

Júlio C.S. Da Silva<sup>1</sup>, Willian R. Rocha<sup>2,\*</sup>, Robert Pennifold<sup>3</sup> and Jeremy N.

Harvey<sup>4,\*</sup>

#### 1. Dinuclear copper complex model built from pMMO dicopper site.

The coordinates of the atoms highlighted by a star were kept frozen during geometry optimization.

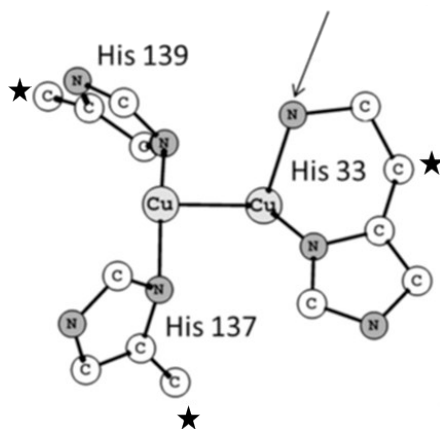

**Figure S1:** The dinuclear copper model built from the crystal structure of pMMO enzyme. The coordinates of the atoms highlighted by a star were kept frozen during geometry optimization.

#### 2. Detailed Computational Results

B3LYP-D2/BS1 Calculated energies (in hartree) and structures (cartesian coordinates in Å) for all species.

**3(a) – Peroxo – <sup>3</sup>A****Etotal (u.a.) = -4530.31002752**

|    |              |              |              |
|----|--------------|--------------|--------------|
| 29 | 2.115041000  | -0.186847000 | -0.386977000 |
| 29 | -1.280564000 | -0.751787000 | -0.365042000 |
| 8  | 0.308759000  | 0.122411000  | -0.781003000 |
| 8  | 0.556239000  | -1.328100000 | -0.506770000 |
| 6  | 4.188312000  | -2.271291000 | 0.398795000  |
| 6  | 5.507960000  | -2.508897000 | 0.120881000  |
| 7  | 3.820308000  | -1.085160000 | -0.227293000 |
| 6  | 4.899754000  | -0.623348000 | -0.860205000 |
| 7  | 5.933362000  | -1.460491000 | -0.670479000 |
| 1  | 3.615912000  | -4.064344000 | 1.414029000  |
| 1  | 2.258894000  | -3.116538000 | 0.759984000  |
| 1  | 6.165132000  | -3.312776000 | 0.415415000  |
| 1  | 4.950023000  | 0.287409000  | -1.437430000 |
| 1  | 6.863078000  | -1.344705000 | -1.053800000 |
| 6  | 3.540301000  | 3.470048000  | 0.824052000  |
| 6  | 3.548659000  | 2.100846000  | 0.799378000  |
| 7  | 2.711784000  | 3.836131000  | -0.224253000 |
| 6  | 2.244126000  | 2.724487000  | -0.829775000 |
| 7  | 2.737636000  | 1.647912000  | -0.229298000 |
| 1  | 4.804199000  | 3.933014000  | 2.469324000  |
| 1  | 3.445419000  | 5.054165000  | 2.269969000  |
| 1  | 2.500052000  | 4.787994000  | -0.497585000 |
| 1  | 4.073834000  | 1.415986000  | 1.448279000  |
| 1  | 1.567164000  | 2.726352000  | -1.671024000 |
| 1  | 3.099736000  | -2.576189000 | 2.226062000  |
| 1  | 4.841945000  | 5.145958000  | 1.177009000  |
| 7  | -2.516103000 | -2.117679000 | 0.164401000  |
| 6  | -3.801881000 | -1.827113000 | 0.610002000  |
| 6  | -2.408503000 | -3.441390000 | 0.104716000  |
| 6  | -4.461237000 | -3.009342000 | 0.814587000  |
| 7  | -3.565728000 | -4.008948000 | 0.492521000  |
| 1  | -1.535369000 | -3.993030000 | -0.211505000 |
| 1  | -5.460524000 | -3.222548000 | 1.162795000  |
| 6  | -4.067701000 | 0.496870000  | -0.401230000 |
| 1  | -3.749273000 | 0.040293000  | 1.673536000  |
| 1  | -5.335525000 | -0.432471000 | 1.080666000  |
| 1  | -3.746469000 | -5.004388000 | 0.538630000  |
| 6  | -4.667320000 | 1.889492000  | -0.083019000 |
| 1  | -4.520233000 | 0.046048000  | -1.289741000 |
| 7  | -2.612449000 | 0.706582000  | -0.655374000 |
| 8  | -3.919234000 | 2.750433000  | 0.380462000  |

|   |              |              |              |
|---|--------------|--------------|--------------|
| 7 | -5.988638000 | 2.024751000  | -0.286446000 |
| 1 | -2.508874000 | 1.055785000  | -1.612250000 |
| 1 | -2.391581000 | 1.534294000  | -0.073736000 |
| 6 | -6.729191000 | 3.251009000  | 0.021424000  |
| 1 | -6.492388000 | 1.266765000  | -0.728238000 |
| 1 | -7.584710000 | 3.018041000  | 0.663279000  |
| 1 | -6.053525000 | 3.930779000  | 0.542977000  |
| 1 | -7.083066000 | 3.724500000  | -0.900790000 |
| 6 | 3.240441000  | -3.050998000 | 1.245668000  |
| 6 | 4.191355000  | 4.456870000  | 1.730365000  |
| 6 | -4.272171000 | -0.419023000 | 0.822350000  |

### 3(b) – Peroxo – <sup>3</sup>A

**Etotal (u.a.) = -4530.30206957**

|    |              |              |              |
|----|--------------|--------------|--------------|
| 29 | 2.036189000  | -0.181411000 | -0.389274000 |
| 29 | -1.198824000 | -0.788554000 | -0.351561000 |
| 8  | 0.324065000  | -0.095472000 | -1.236266000 |
| 8  | 0.597832000  | -1.469721000 | -0.774545000 |
| 6  | 4.193271000  | -2.150201000 | 0.538578000  |
| 6  | 5.543815000  | -2.283645000 | 0.357296000  |
| 7  | 3.789984000  | -0.955333000 | -0.046820000 |
| 6  | 4.880326000  | -0.389258000 | -0.567235000 |
| 7  | 5.953549000  | -1.164732000 | -0.339682000 |
| 1  | 3.706196000  | -4.018396000 | 1.453588000  |
| 1  | 2.347438000  | -3.220403000 | 0.630306000  |
| 1  | 6.230559000  | -3.059558000 | 0.659288000  |
| 1  | 4.911109000  | 0.553946000  | -1.090852000 |
| 1  | 6.898918000  | -0.966345000 | -0.642466000 |
| 6  | 3.446860000  | 3.488154000  | 0.876087000  |
| 6  | 3.361757000  | 2.122062000  | 0.904783000  |
| 7  | 2.639849000  | 3.867628000  | -0.184751000 |
| 6  | 2.101602000  | 2.766081000  | -0.750351000 |
| 7  | 2.523005000  | 1.682590000  | -0.108187000 |
| 1  | 4.764690000  | 3.915948000  | 2.488452000  |
| 1  | 3.508099000  | 5.142825000  | 2.246923000  |
| 1  | 2.485580000  | 4.820368000  | -0.492032000 |
| 1  | 3.844328000  | 1.429519000  | 1.577578000  |
| 1  | 1.438099000  | 2.780375000  | -1.602549000 |
| 1  | 2.917959000  | -2.619013000 | 2.202807000  |
| 1  | 4.892065000  | 5.059113000  | 1.138244000  |
| 7  | -2.368463000 | -2.065184000 | 0.479761000  |

|   |              |              |              |
|---|--------------|--------------|--------------|
| 6 | -3.686344000 | -1.800356000 | 0.842316000  |
| 6 | -2.172967000 | -3.371857000 | 0.633648000  |
| 6 | -4.270359000 | -2.979593000 | 1.220836000  |
| 7 | -3.300143000 | -3.951376000 | 1.084816000  |
| 1 | -1.257678000 | -3.903776000 | 0.419080000  |
| 1 | -5.264778000 | -3.205069000 | 1.575294000  |
| 6 | -4.017242000 | 0.362757000  | -0.482227000 |
| 1 | -3.872370000 | 0.183020000  | 1.651195000  |
| 1 | -5.352518000 | -0.489084000 | 0.982782000  |
| 1 | -3.416250000 | -4.937380000 | 1.284984000  |
| 6 | -4.726625000 | 1.734392000  | -0.369375000 |
| 1 | -4.360649000 | -0.214248000 | -1.346534000 |
| 7 | -2.560336000 | 0.646328000  | -0.648717000 |
| 8 | -4.087297000 | 2.677135000  | 0.097239000  |
| 7 | -6.018594000 | 1.766427000  | -0.738046000 |
| 1 | -2.423982000 | 0.999037000  | -1.600880000 |
| 1 | -2.418171000 | 1.487838000  | -0.065472000 |
| 6 | -6.856199000 | 2.963810000  | -0.630117000 |
| 1 | -6.423695000 | 0.942298000  | -1.162512000 |
| 1 | -7.771907000 | 2.728583000  | -0.078564000 |
| 1 | -6.288576000 | 3.724605000  | -0.091868000 |
| 1 | -7.116018000 | 3.338864000  | -1.625992000 |
| 6 | 3.240441000  | -3.050999000 | 1.245668000  |
| 6 | 4.191353000  | 4.456870000  | 1.730365000  |
| 6 | -4.272169000 | -0.419022000 | 0.822350000  |

### 3(c) – Bis-oxo-<sup>1</sup>A

**Etotal (u.a.) = -4530.30667145**

|    |              |              |              |
|----|--------------|--------------|--------------|
| 29 | 1.740247000  | -0.071535000 | -0.127203000 |
| 29 | -1.010299000 | -0.419898000 | 0.072516000  |
| 8  | 0.215722000  | 0.841200000  | -0.076645000 |
| 8  | 0.514209000  | -1.384218000 | -0.003921000 |
| 6  | 3.839419000  | -2.306453000 | 0.098590000  |
| 6  | 4.973402000  | -2.618024000 | -0.604071000 |
| 7  | 3.343815000  | -1.105407000 | -0.409549000 |
| 6  | 4.170128000  | -0.716296000 | -1.384724000 |
| 7  | 5.159873000  | -1.609887000 | -1.526694000 |
| 1  | 3.606074000  | -4.081556000 | 1.259682000  |
| 1  | 2.146763000  | -3.056822000 | 1.167366000  |
| 1  | 5.649843000  | -3.454586000 | -0.517191000 |
| 1  | 4.074823000  | 0.185804000  | -1.968470000 |
| 1  | 5.914799000  | -1.549656000 | -2.198584000 |
| 6  | 3.533393000  | 3.439807000  | 0.862777000  |

|   |              |              |              |
|---|--------------|--------------|--------------|
| 6 | 3.492608000  | 2.070331000  | 0.902171000  |
| 7 | 2.720726000  | 3.789709000  | -0.204951000 |
| 6 | 2.203515000  | 2.678052000  | -0.756830000 |
| 7 | 2.660646000  | 1.611234000  | -0.107280000 |
| 1 | 4.790472000  | 3.960812000  | 2.499079000  |
| 1 | 3.444927000  | 5.084663000  | 2.233326000  |
| 1 | 2.549240000  | 4.736606000  | -0.521104000 |
| 1 | 3.989837000  | 1.394788000  | 1.581859000  |
| 1 | 1.490017000  | 2.663558000  | -1.565464000 |
| 1 | 3.506499000  | -2.584209000 | 2.203338000  |
| 1 | 4.855590000  | 5.112087000  | 1.152817000  |
| 7 | -2.245071000 | -1.840912000 | 0.265710000  |
| 6 | -3.604586000 | -1.734776000 | 0.541095000  |
| 6 | -1.957628000 | -3.128954000 | 0.107340000  |
| 6 | -4.127891000 | -2.999954000 | 0.540191000  |
| 7 | -3.076905000 | -3.854992000 | 0.269627000  |
| 1 | -0.976912000 | -3.519842000 | -0.120873000 |
| 1 | -5.130651000 | -3.358403000 | 0.717641000  |
| 6 | -3.844542000 | 0.700646000  | -0.140599000 |
| 1 | -4.047260000 | -0.082701000 | 1.844797000  |
| 1 | -5.357630000 | -0.544017000 | 0.764848000  |
| 1 | -3.137573000 | -4.863744000 | 0.201086000  |
| 6 | -4.579350000 | 2.003669000  | 0.266614000  |
| 1 | -4.038422000 | 0.414439000  | -1.178817000 |
| 7 | -2.389670000 | 0.972736000  | 0.014161000  |
| 8 | -4.032560000 | 2.741541000  | 1.084063000  |
| 7 | -5.797035000 | 2.185274000  | -0.272233000 |
| 1 | -2.085754000 | 1.601206000  | -0.735272000 |
| 1 | -2.325142000 | 1.569731000  | 0.856273000  |
| 6 | -6.661491000 | 3.320597000  | 0.063226000  |
| 1 | -6.123706000 | 1.532288000  | -0.972529000 |
| 1 | -7.643152000 | 2.958092000  | 0.384120000  |
| 1 | -6.190388000 | 3.873755000  | 0.877330000  |
| 1 | -6.780487000 | 3.977994000  | -0.804742000 |
| 6 | 3.240442000  | -3.050995000 | 1.245668000  |
| 6 | 4.191343000  | 4.456860000  | 1.730364000  |
| 6 | -4.272160000 | -0.419016000 | 0.822351000  |

### 3(d) – Bis-oxo-<sup>3</sup>A

**Etotal (u.a.) = -4530.28101771**

|    |              |              |              |
|----|--------------|--------------|--------------|
| 29 | 1.779903000  | -0.121770000 | -0.281722000 |
| 29 | -1.103121000 | -0.614000000 | -0.220495000 |

|   |              |              |              |
|---|--------------|--------------|--------------|
| 8 | 0.099911000  | 0.452163000  | -0.957769000 |
| 8 | 0.440032000  | -1.539130000 | -0.230969000 |
| 6 | 4.032752000  | -2.165413000 | 0.345381000  |
| 6 | 5.327712000  | -2.318563000 | -0.073613000 |
| 7 | 3.539910000  | -0.978153000 | -0.188946000 |
| 6 | 4.525901000  | -0.439178000 | -0.909479000 |
| 7 | 5.615949000  | -1.222200000 | -0.860177000 |
| 1 | 3.733289000  | -4.020900000 | 1.357586000  |
| 1 | 2.234574000  | -3.210562000 | 0.836207000  |
| 1 | 6.050776000  | -3.095418000 | 0.122731000  |
| 1 | 4.470774000  | 0.492634000  | -1.450897000 |
| 1 | 6.493765000  | -1.040833000 | -1.330305000 |
| 6 | 3.417653000  | 3.493489000  | 0.896898000  |
| 6 | 3.379776000  | 2.124378000  | 0.868491000  |
| 7 | 2.503683000  | 3.891045000  | -0.066077000 |
| 6 | 1.946291000  | 2.798349000  | -0.628188000 |
| 7 | 2.461468000  | 1.703251000  | -0.080446000 |
| 1 | 4.847418000  | 3.911513000  | 2.414679000  |
| 1 | 3.524759000  | 5.088998000  | 2.330656000  |
| 1 | 2.295103000  | 4.850585000  | -0.313653000 |
| 1 | 3.944748000  | 1.419873000  | 1.460085000  |
| 1 | 1.186302000  | 2.817841000  | -1.394280000 |
| 1 | 3.130927000  | -2.608793000 | 2.245033000  |
| 1 | 4.815959000  | 5.114114000  | 1.112099000  |
| 7 | -2.255098000 | -1.921570000 | 0.507186000  |
| 6 | -3.591979000 | -1.755994000 | 0.855107000  |
| 6 | -1.946360000 | -3.206847000 | 0.662638000  |
| 6 | -4.077956000 | -2.980134000 | 1.227829000  |
| 7 | -3.028536000 | -3.869700000 | 1.102046000  |
| 1 | -0.980512000 | -3.641435000 | 0.452397000  |
| 1 | -5.053759000 | -3.285611000 | 1.574337000  |
| 6 | -3.966828000 | 0.387805000  | -0.452879000 |
| 1 | -3.968978000 | 0.192201000  | 1.684601000  |
| 1 | -5.354215000 | -0.559897000 | 0.901642000  |
| 1 | -3.067391000 | -4.862583000 | 1.300166000  |
| 6 | -4.686669000 | 1.757477000  | -0.343879000 |
| 1 | -4.253526000 | -0.173775000 | -1.346765000 |
| 7 | -2.510699000 | 0.700766000  | -0.533430000 |
| 8 | -4.078587000 | 2.679620000  | 0.198989000  |
| 7 | -5.947190000 | 1.801167000  | -0.801873000 |
| 1 | -2.297297000 | 1.069120000  | -1.465667000 |
| 1 | -2.402920000 | 1.528581000  | 0.079614000  |
| 6 | -6.794997000 | 2.994191000  | -0.709726000 |
| 1 | -6.322877000 | 0.989631000  | -1.275278000 |
| 1 | -7.735266000 | 2.743381000  | -0.208841000 |
| 1 | -6.258255000 | 3.745802000  | -0.128743000 |
| 1 | -7.006371000 | 3.386608000  | -1.710058000 |

|   |              |              |             |
|---|--------------|--------------|-------------|
| 6 | 3.240441000  | -3.050999000 | 1.245668000 |
| 6 | 4.191353000  | 4.456870000  | 1.730365000 |
| 6 | -4.272169000 | -0.419022000 | 0.822350000 |

**4(b) – TS1-1A**

**Ettotal (u.a.) = -4570.77877840**

|    |              |              |              |
|----|--------------|--------------|--------------|
| 29 | 1.695349000  | -0.134312000 | -0.182205000 |
| 29 | -1.213385000 | -0.639385000 | -0.238623000 |
| 8  | 0.063330000  | 0.596349000  | -0.191263000 |
| 8  | 0.477961000  | -1.681029000 | -0.431397000 |
| 1  | 0.616097000  | -2.152878000 | -1.314879000 |
| 6  | 1.008600000  | -3.771214000 | -1.084868000 |
| 1  | 2.084097000  | -3.657353000 | -1.178214000 |
| 1  | 0.460867000  | -4.044420000 | -1.987777000 |
| 1  | 0.645642000  | -4.169000000 | -0.145715000 |
| 6  | 3.926045000  | -2.244896000 | 0.186424000  |
| 6  | 5.159809000  | -2.453813000 | -0.375252000 |
| 7  | 3.404560000  | -1.066331000 | -0.346816000 |
| 6  | 4.316093000  | -0.583297000 | -1.191393000 |
| 7  | 5.383975000  | -1.398698000 | -1.234438000 |
| 1  | 3.585990000  | -2.760145000 | 2.245964000  |
| 1  | 3.444824000  | -4.118823000 | 1.119633000  |
| 1  | 5.885549000  | -3.238793000 | -0.225013000 |
| 1  | 4.225434000  | 0.331507000  | -1.757418000 |
| 1  | 6.211265000  | -1.258112000 | -1.800809000 |
| 6  | 3.392121000  | 3.453825000  | 0.966917000  |
| 6  | 3.429069000  | 2.084792000  | 0.888273000  |
| 7  | 2.345199000  | 3.827296000  | 0.138190000  |
| 6  | 1.781594000  | 2.727163000  | -0.393197000 |
| 7  | 2.423520000  | 1.646467000  | 0.038154000  |
| 1  | 4.951317000  | 3.950793000  | 2.332439000  |
| 1  | 3.551592000  | 5.035418000  | 2.408700000  |
| 1  | 2.049326000  | 4.780181000  | -0.033550000 |
| 1  | 4.098386000  | 1.394784000  | 1.379632000  |
| 1  | 0.911966000  | 2.717049000  | -1.029084000 |
| 1  | 2.159464000  | -2.885694000 | 1.199864000  |
| 1  | 4.701338000  | 5.159675000  | 1.059331000  |
| 7  | -2.550908000 | -2.021744000 | -0.132522000 |
| 6  | -3.842435000 | -1.765903000 | 0.322099000  |
| 6  | -2.501588000 | -3.309967000 | -0.456383000 |
| 6  | -4.562024000 | -2.928608000 | 0.253203000  |
| 7  | -3.699149000 | -3.885801000 | -0.237773000 |
| 1  | -1.639510000 | -3.833621000 | -0.837199000 |

|   |              |              |              |
|---|--------------|--------------|--------------|
| 1 | -5.583796000 | -3.155148000 | 0.517673000  |
| 6 | -3.951567000 | 0.729341000  | -0.151100000 |
| 1 | -3.785266000 | -0.187958000 | 1.780643000  |
| 1 | -5.349338000 | -0.436528000 | 1.014425000  |
| 1 | -3.925045000 | -4.859045000 | -0.402255000 |
| 6 | -4.503505000 | 2.052201000  | 0.440370000  |
| 1 | -4.368797000 | 0.514712000  | -1.139923000 |
| 7 | -2.482298000 | 0.890011000  | -0.270964000 |
| 8 | -3.755607000 | 2.739827000  | 1.132307000  |
| 7 | -5.800001000 | 2.308992000  | 0.188857000  |
| 1 | -2.264264000 | 1.431581000  | -1.109777000 |
| 1 | -2.213783000 | 1.522655000  | 0.499581000  |
| 6 | -6.506864000 | 3.474580000  | 0.725197000  |
| 1 | -6.303951000 | 1.698263000  | -0.440575000 |
| 1 | -5.837374000 | 3.982989000  | 1.420937000  |
| 1 | -6.781856000 | 4.160315000  | -0.083643000 |
| 1 | -7.410314000 | 3.152899000  | 1.253113000  |
| 6 | 3.240442000  | -3.050995000 | 1.245668000  |
| 6 | 4.191343000  | 4.456860000  | 1.730364000  |
| 6 | -4.272160000 | -0.419016000 | 0.822351000  |

#### 4(b) – TS1 – <sup>3</sup>A

**Etotal (u.a.) = -4570.79899200**

|    |              |              |              |
|----|--------------|--------------|--------------|
| 29 | 1.768650000  | -0.117227000 | -0.243320000 |
| 29 | -1.078663000 | -0.642719000 | -0.118956000 |
| 8  | 0.081545000  | 0.610557000  | -0.577858000 |
| 8  | 0.471064000  | -1.679683000 | -0.044093000 |
| 1  | 0.570738000  | -2.105102000 | -1.195115000 |
| 6  | 0.664196000  | -2.047645000 | -2.499424000 |
| 1  | 1.691277000  | -2.358269000 | -2.701751000 |
| 1  | 0.462719000  | -0.993714000 | -2.702614000 |
| 1  | -0.092014000 | -2.738316000 | -2.879091000 |
| 6  | 3.999832000  | -2.215757000 | 0.269027000  |
| 6  | 5.271646000  | -2.406778000 | -0.203334000 |
| 7  | 3.502405000  | -1.037874000 | -0.283466000 |
| 6  | 4.465138000  | -0.538636000 | -1.060703000 |
| 7  | 5.543006000  | -1.340807000 | -1.036945000 |
| 1  | 3.728379000  | -4.021236000 | 1.376245000  |
| 1  | 2.210790000  | -3.210592000 | 0.904680000  |
| 1  | 5.990808000  | -3.188910000 | -0.013346000 |
| 1  | 4.403787000  | 0.382734000  | -1.619590000 |



|   |              |              |              |
|---|--------------|--------------|--------------|
| 1 | 6.405065000  | -1.186150000 | -1.544277000 |
| 6 | 3.438931000  | 3.487114000  | 0.885236000  |
| 6 | 3.457395000  | 2.118942000  | 0.808778000  |
| 7 | 2.477241000  | 3.878283000  | -0.032983000 |
| 6 | 1.946630000  | 2.782655000  | -0.613568000 |
| 7 | 2.525512000  | 1.692642000  | -0.123734000 |
| 1 | 4.882359000  | 3.919707000  | 2.386252000  |
| 1 | 3.511935000  | 5.043969000  | 2.361222000  |
| 1 | 2.219675000  | 4.835842000  | -0.237469000 |
| 1 | 4.068919000  | 1.419240000  | 1.358685000  |
| 1 | 1.146461000  | 2.792462000  | -1.337255000 |
| 1 | 3.191322000  | -2.562703000 | 2.228202000  |
| 1 | 4.777012000  | 5.156160000  | 1.120103000  |
| 7 | -2.310167000 | -1.982825000 | 0.483049000  |
| 6 | -3.643427000 | -1.780563000 | 0.820897000  |
| 6 | -2.045328000 | -3.276310000 | 0.645489000  |
| 6 | -4.176266000 | -2.989526000 | 1.179989000  |
| 7 | -3.154218000 | -3.910879000 | 1.064226000  |
| 1 | -1.085820000 | -3.740671000 | 0.475604000  |
| 1 | -5.165205000 | -3.264927000 | 1.514136000  |
| 6 | -3.922840000 | 0.420433000  | -0.418483000 |
| 1 | -3.955117000 | 0.150949000  | 1.707644000  |
| 1 | -5.359671000 | -0.520844000 | 0.888243000  |
| 1 | -3.224589000 | -4.901240000 | 1.264826000  |
| 6 | -4.615698000 | 1.801485000  | -0.283098000 |
| 1 | -4.206453000 | -0.105173000 | -1.335339000 |
| 7 | -2.461396000 | 0.690397000  | -0.454294000 |
| 8 | -4.009379000 | 2.694709000  | 0.305073000  |
| 7 | -5.862742000 | 1.883865000  | -0.776973000 |
| 1 | -2.200049000 | 1.088755000  | -1.360334000 |
| 1 | -2.316585000 | 1.480919000  | 0.195465000  |
| 6 | -6.691405000 | 3.087986000  | -0.667680000 |
| 1 | -6.240996000 | 1.093393000  | -1.282433000 |
| 1 | -6.153845000 | 3.812389000  | -0.053726000 |
| 1 | -6.874855000 | 3.513996000  | -1.659870000 |
| 1 | -7.646735000 | 2.841016000  | -0.193803000 |
| 6 | 3.240468000  | -3.050945000 | 1.245673000  |
| 6 | 4.191316000  | 4.456792000  | 1.730358000  |
| 6 | -4.272158000 | -0.418999000 | 0.822352000  |

**5(a) – Intermediate – <sup>3</sup>A**

**Ettotal (u.a.) = -4570.81251744**

|    |              |              |              |
|----|--------------|--------------|--------------|
| 29 | 1.786460000  | -0.124338000 | -0.207114000 |
| 29 | -1.058319000 | -0.600223000 | -0.051603000 |

|   |              |              |              |
|---|--------------|--------------|--------------|
| 8 | 0.110759000  | 0.692772000  | -0.344767000 |
| 8 | 0.472738000  | -1.674925000 | -0.059780000 |
| 1 | 0.503428000  | -2.127526000 | -0.929401000 |
| 6 | 0.706081000  | -1.262272000 | -3.030317000 |
| 1 | 0.098814000  | -1.707189000 | -3.811781000 |
| 1 | 1.747599000  | -1.559450000 | -2.942019000 |
| 1 | 0.361601000  | -0.376028000 | -2.505013000 |
| 6 | 3.969554000  | -2.276188000 | 0.197419000  |
| 6 | 5.204115000  | -2.523192000 | -0.343380000 |
| 7 | 3.479599000  | -1.097982000 | -0.360693000 |
| 6 | 4.409783000  | -0.651660000 | -1.206524000 |
| 7 | 5.459963000  | -1.490058000 | -1.222189000 |
| 1 | 3.653029000  | -4.060578000 | 1.330822000  |
| 1 | 2.172736000  | -3.116585000 | 1.006698000  |
| 1 | 5.907834000  | -3.323870000 | -0.173839000 |
| 1 | 4.345230000  | 0.256485000  | -1.786475000 |
| 1 | 6.295231000  | -1.379083000 | -1.783036000 |
| 6 | 3.470574000  | 3.474025000  | 0.873624000  |
| 6 | 3.497988000  | 2.104865000  | 0.809914000  |
| 7 | 2.530320000  | 3.852304000  | -0.071666000 |
| 6 | 2.018435000  | 2.749398000  | -0.653793000 |
| 7 | 2.590960000  | 1.666039000  | -0.140202000 |
| 1 | 4.873475000  | 3.932040000  | 2.405199000  |
| 1 | 3.489696000  | 5.038543000  | 2.341728000  |
| 1 | 2.275415000  | 4.807003000  | -0.292124000 |
| 1 | 4.100614000  | 1.413470000  | 1.380064000  |
| 1 | 1.233203000  | 2.749383000  | -1.393190000 |
| 1 | 3.330453000  | -2.567059000 | 2.227565000  |
| 1 | 4.782638000  | 5.160315000  | 1.130245000  |
| 7 | -2.319471000 | -1.974272000 | 0.396210000  |
| 6 | -3.658345000 | -1.782912000 | 0.717117000  |
| 6 | -2.071061000 | -3.279103000 | 0.472942000  |
| 6 | -4.211754000 | -3.008760000 | 0.972994000  |
| 7 | -3.195943000 | -3.930245000 | 0.815607000  |
| 1 | -1.111353000 | -3.742685000 | 0.304387000  |
| 1 | -5.211113000 | -3.296281000 | 1.263047000  |
| 6 | -3.861792000 | 0.533792000  | -0.311276000 |
| 1 | -3.989496000 | 0.056654000  | 1.772649000  |
| 1 | -5.362526000 | -0.511652000 | 0.831656000  |
| 1 | -3.280075000 | -4.931790000 | 0.942027000  |
| 6 | -4.548731000 | 1.903640000  | -0.070119000 |
| 1 | -4.104959000 | 0.106480000  | -1.288822000 |
| 7 | -2.398780000 | 0.787904000  | -0.251409000 |
| 8 | -3.966954000 | 2.722526000  | 0.638033000  |
| 7 | -5.765586000 | 2.053782000  | -0.620403000 |
| 1 | -2.093501000 | 1.297141000  | -1.085156000 |
| 1 | -2.271494000 | 1.484040000  | 0.501460000  |

|   |              |              |              |
|---|--------------|--------------|--------------|
| 6 | -6.591112000 | 3.249938000  | -0.428976000 |
| 1 | -6.125164000 | 1.321369000  | -1.218486000 |
| 1 | -6.057970000 | 3.922878000  | 0.244515000  |
| 1 | -6.759787000 | 3.749612000  | -1.388666000 |
| 1 | -7.553697000 | 2.974031000  | 0.013662000  |
| 6 | 3.240390000  | -3.050998000 | 1.245664000  |
| 6 | 4.191359000  | 4.456889000  | 1.730367000  |
| 6 | -4.272124000 | -0.419042000 | 0.822352000  |

**5(b) – TS2 – <sup>3</sup>A**

**Etotal (u.a.) = -4570.80044538**

|    |              |              |              |
|----|--------------|--------------|--------------|
| 29 | 1.672435000  | -0.134404000 | -0.205229000 |
| 29 | -1.134922000 | -0.756861000 | -0.160209000 |
| 8  | 0.006205000  | 0.478313000  | -0.746146000 |
| 8  | 0.447869000  | -1.772880000 | 0.071997000  |
| 1  | 0.564995000  | -2.287021000 | 0.893101000  |
| 6  | 1.044744000  | -2.390357000 | -2.159275000 |
| 1  | 0.425618000  | -3.269539000 | -2.292919000 |
| 1  | 2.103737000  | -2.508220000 | -1.964566000 |
| 1  | 0.634216000  | -1.405350000 | -2.354857000 |
| 6  | 4.010950000  | -2.120870000 | 0.368746000  |
| 6  | 5.314911000  | -2.225426000 | -0.037873000 |
| 7  | 3.473381000  | -0.955083000 | -0.169016000 |
| 6  | 4.443186000  | -0.379892000 | -0.880431000 |
| 7  | 5.564740000  | -1.119829000 | -0.824346000 |
| 1  | 3.885783000  | -3.855096000 | 1.610223000  |
| 1  | 2.406006000  | -3.507350000 | 0.696232000  |
| 1  | 6.067475000  | -2.971745000 | 0.166672000  |
| 1  | 4.358049000  | 0.555469000  | -1.412443000 |
| 1  | 6.441337000  | -0.898862000 | -1.279863000 |
| 6  | 3.339867000  | 3.492135000  | 0.977848000  |
| 6  | 3.371501000  | 2.127087000  | 0.868350000  |
| 7  | 2.257537000  | 3.881840000  | 0.204536000  |
| 6  | 1.674942000  | 2.787362000  | -0.328100000 |
| 7  | 2.334085000  | 1.700695000  | 0.053782000  |
| 1  | 4.971593000  | 3.916946000  | 2.274396000  |
| 1  | 3.601065000  | 5.025143000  | 2.460488000  |
| 1  | 1.952548000  | 4.836750000  | 0.063132000  |
| 1  | 4.060137000  | 1.429876000  | 1.320941000  |
| 1  | 0.788595000  | 2.786486000  | -0.943259000 |
| 1  | 2.832962000  | -2.525107000 | 2.119729000  |
| 1  | 4.679701000  | 5.174066000  | 1.058286000  |

|   |              |              |              |
|---|--------------|--------------|--------------|
| 7 | -2.395425000 | -2.073224000 | 0.468824000  |
| 6 | -3.716100000 | -1.810721000 | 0.814505000  |
| 6 | -2.215699000 | -3.387777000 | 0.555513000  |
| 6 | -4.322725000 | -3.001447000 | 1.114358000  |
| 7 | -3.360420000 | -3.976837000 | 0.947291000  |
| 1 | -1.299661000 | -3.911638000 | 0.328011000  |
| 1 | -5.327688000 | -3.233187000 | 1.433499000  |
| 6 | -3.995207000 | 0.342035000  | -0.490107000 |
| 1 | -3.842144000 | 0.168522000  | 1.645914000  |
| 1 | -5.352158000 | -0.458951000 | 0.992128000  |
| 1 | -3.494052000 | -4.970799000 | 1.089116000  |
| 6 | -4.609499000 | 1.761410000  | -0.369258000 |
| 1 | -4.395350000 | -0.214579000 | -1.342890000 |
| 7 | -2.534456000 | 0.528864000  | -0.676050000 |
| 8 | -3.906063000 | 2.661596000  | 0.085431000  |
| 7 | -5.902703000 | 1.871818000  | -0.718904000 |
| 1 | -2.322053000 | 0.751983000  | -1.651604000 |
| 1 | -2.305382000 | 1.403899000  | -0.176915000 |
| 6 | -6.660540000 | 3.120951000  | -0.606131000 |
| 1 | -6.363909000 | 1.074924000  | -1.137892000 |
| 1 | -6.884542000 | 3.523853000  | -1.599935000 |
| 1 | -7.595271000 | 2.939431000  | -0.066593000 |
| 1 | -6.050193000 | 3.836899000  | -0.053301000 |
| 6 | 3.240435000  | -3.050972000 | 1.245669000  |
| 6 | 4.191289000  | 4.456811000  | 1.730357000  |
| 6 | -4.272098000 | -0.418990000 | 0.822357000  |

### 5(c) – Methanol-Complex -<sup>3</sup>A

**Etotal (u.a.) = -4570.88740421**

|    |              |              |              |
|----|--------------|--------------|--------------|
| 29 | 1.724797000  | -0.270891000 | -0.014986000 |
| 29 | -1.455799000 | -1.523670000 | -0.332554000 |
| 8  | 0.134942000  | -0.689714000 | -0.583616000 |
| 8  | -0.488017000 | -3.299371000 | -0.028718000 |
| 1  | -0.977398000 | -4.093152000 | 0.238684000  |
| 6  | 0.613314000  | -3.654763000 | -0.906155000 |
| 1  | 0.238860000  | -4.026197000 | -1.867076000 |
| 1  | 1.239083000  | -4.407934000 | -0.420837000 |
| 1  | 1.160812000  | -2.723504000 | -1.042770000 |
| 6  | 4.021383000  | -2.211245000 | 0.282691000  |
| 6  | 5.279836000  | -2.404596000 | -0.225989000 |
| 7  | 3.526717000  | -1.011565000 | -0.217931000 |
| 6  | 4.469833000  | -0.500779000 | -1.006642000 |
| 7  | 5.541363000  | -1.316517000 | -1.032229000 |

|   |              |              |              |
|---|--------------|--------------|--------------|
| 1 | 3.352542000  | -4.118362000 | 1.028323000  |
| 1 | 2.177602000  | -2.786688000 | 1.183158000  |
| 1 | 5.996935000  | -3.198455000 | -0.082022000 |
| 1 | 4.400677000  | 0.424843000  | -1.558998000 |
| 1 | 6.389839000  | -1.160170000 | -1.561510000 |
| 6 | 3.221588000  | 3.367245000  | 1.384414000  |
| 6 | 3.389408000  | 2.070528000  | 0.969695000  |
| 7 | 1.846690000  | 3.539209000  | 1.426775000  |
| 6 | 1.239136000  | 2.393407000  | 1.047034000  |
| 7 | 2.154594000  | 1.473968000  | 0.758287000  |
| 1 | 5.215150000  | 4.084200000  | 1.634974000  |
| 1 | 4.051454000  | 4.804662000  | 2.761592000  |
| 1 | 1.370422000  | 4.388561000  | 1.701939000  |
| 1 | 4.309553000  | 1.526676000  | 0.821535000  |
| 1 | 0.165386000  | 2.268382000  | 1.003695000  |
| 1 | 3.566314000  | -2.883231000 | 2.279914000  |
| 1 | 4.077594000  | 5.318611000  | 1.060574000  |
| 7 | -3.217374000 | -2.409802000 | -0.287024000 |
| 6 | -4.362815000 | -1.745317000 | 0.136493000  |
| 6 | -3.616204000 | -3.552565000 | -0.835084000 |
| 6 | -5.452993000 | -2.518368000 | -0.163573000 |
| 7 | -4.959225000 | -3.652131000 | -0.774274000 |
| 1 | -2.979680000 | -4.297331000 | -1.290265000 |
| 1 | -6.508507000 | -2.372100000 | 0.009570000  |
| 6 | -3.648685000 | 0.695402000  | -0.063617000 |
| 1 | -3.654626000 | -0.519383000 | 1.725980000  |
| 1 | -5.266290000 | -0.104048000 | 1.152157000  |
| 1 | -5.510754000 | -4.428947000 | -1.117965000 |
| 6 | -3.358155000 | 1.951660000  | 0.799878000  |
| 1 | -4.354724000 | 0.944921000  | -0.862758000 |
| 7 | -2.357488000 | 0.275237000  | -0.662345000 |
| 8 | -2.191159000 | 2.274621000  | 1.039497000  |
| 7 | -4.439992000 | 2.590884000  | 1.273735000  |
| 1 | -2.380230000 | 0.402400000  | -1.674272000 |
| 1 | -1.643161000 | 0.928671000  | -0.314469000 |
| 6 | -4.365174000 | 3.783147000  | 2.120416000  |
| 1 | -5.354003000 | 2.295784000  | 0.956811000  |
| 1 | -4.525449000 | 4.691930000  | 1.528969000  |
| 1 | -5.125811000 | 3.719317000  | 2.903526000  |
| 1 | -3.373091000 | 3.817326000  | 2.573504000  |
| 6 | 3.240443000  | -3.050992000 | 1.245668000  |
| 6 | 4.191340000  | 4.456855000  | 1.730364000  |
| 6 | -4.272158000 | -0.419015000 | 0.822351000  |

### 3. Basis set definitions (BSII) used in CCSD(T)-F12 calculations

**BSII:**

Cu: cc-pwCVTZ, O: cc-pVTZ, N, cc-pVTZ, H: cc-pVTZ

**Density-fitting set:**

Cu: aug-cc-pVTZ/mp2fit

O: aug-cc-pVTZ/mp2fit

N: aug-cc-pVTZ/mp2fit

H: aug-cc-pVTZ/mp2fit

**Coulomb/exchange fitting set:**

Cu: def2-tzvpp/jkfit

O: aug-cc-pVTZ/jkfit

N: aug-cc-pVTZ/jkfit

H: aug-cc-pVTZ/jkfit

**Resolution of the identity basis for F12:**

Cu: def2-tzvpp/jkfit

O: aug-cc-pVTZ/optri

N: aug-cc-pVTZ/optri

H: aug-cc-pVTZ/optri

**4. B3LYP/BS1 optimized structures for models used in CCSD(T)-F12 calculations.****(1)-D3h**

|    |              |              |              |
|----|--------------|--------------|--------------|
| 29 | 0.000000000  | 0.000000000  | 0.000000000  |
| 1  | 0.000000000  | 0.941614000  | 2.310524000  |
| 1  | -0.815462000 | -0.470807000 | 2.310524000  |
| 1  | 0.815462000  | -0.470807000 | 2.310524000  |
| 1  | -0.815462000 | -0.470807000 | -2.310524000 |
| 1  | 0.000000000  | 0.941614000  | -2.310524000 |
| 1  | 0.815462000  | -0.470807000 | -2.310524000 |
| 7  | 0.000000000  | 0.000000000  | 1.904068000  |
| 7  | 0.000000000  | 0.000000000  | -1.904068000 |

**(2)-D2h-Singlet**

|    |              |              |              |
|----|--------------|--------------|--------------|
| 8  | 0.000000000  | 0.732750000  | 0.000000000  |
| 8  | 0.000000000  | -0.732750000 | 0.000000000  |
| 29 | -1.727519000 | 0.000000000  | 0.000000000  |
| 29 | 1.727519000  | 0.000000000  | 0.000000000  |
| 1  | 3.584333000  | 1.610597000  | 0.814355000  |
| 1  | 3.584333000  | 1.610597000  | -0.814355000 |
| 1  | 2.456168000  | 2.454937000  | 0.000000000  |
| 1  | 2.456168000  | -2.454937000 | 0.000000000  |
| 1  | 3.584333000  | -1.610597000 | -0.814355000 |
| 1  | 3.584333000  | -1.610597000 | 0.814355000  |
| 1  | -3.584333000 | -1.610597000 | 0.814355000  |
| 1  | -3.584333000 | -1.610597000 | -0.814355000 |
| 1  | -2.456168000 | -2.454937000 | 0.000000000  |
| 1  | -3.584333000 | 1.610597000  | -0.814355000 |
| 1  | -3.584333000 | 1.610597000  | 0.814355000  |
| 1  | -2.456168000 | 2.454937000  | 0.000000000  |
| 7  | 2.963086000  | 1.564279000  | 0.000000000  |
| 7  | 2.963086000  | -1.564279000 | 0.000000000  |
| 7  | -2.963086000 | -1.564279000 | 0.000000000  |
| 7  | -2.963086000 | 1.564279000  | 0.000000000  |

### (2)-D2h-Triplet

|    |              |              |              |
|----|--------------|--------------|--------------|
| 8  | 0.000000000  | 0.768059000  | 0.000000000  |
| 8  | 0.000000000  | -0.768059000 | 0.000000000  |
| 29 | -1.752990000 | 0.000000000  | 0.000000000  |
| 29 | 1.752990000  | 0.000000000  | 0.000000000  |
| 1  | 3.651454000  | 1.575221000  | 0.815633000  |
| 1  | 3.651454000  | 1.575221000  | -0.815633000 |
| 1  | 2.517578000  | 2.416864000  | 0.000000000  |
| 1  | 2.517578000  | -2.416864000 | 0.000000000  |
| 1  | 3.651454000  | -1.575221000 | -0.815633000 |
| 1  | 3.651454000  | -1.575221000 | 0.815633000  |
| 1  | -3.651454000 | -1.575221000 | 0.815633000  |
| 1  | -3.651454000 | -1.575221000 | -0.815633000 |
| 1  | -2.517578000 | -2.416864000 | 0.000000000  |
| 1  | -3.651454000 | 1.575221000  | -0.815633000 |
| 1  | -3.651454000 | 1.575221000  | 0.815633000  |
| 1  | -2.517578000 | 2.416864000  | 0.000000000  |
| 7  | 3.031635000  | 1.529370000  | 0.000000000  |
| 7  | 3.031635000  | -1.529370000 | 0.000000000  |
| 7  | -3.031635000 | -1.529370000 | 0.000000000  |
| 7  | -3.031635000 | 1.529370000  | 0.000000000  |

### (3)-D2h-Singlet

|    |              |              |              |
|----|--------------|--------------|--------------|
| 8  | 0.000000000  | 1.112860000  | 0.000000000  |
| 8  | 0.000000000  | -1.112860000 | 0.000000000  |
| 29 | -1.389652000 | 0.000000000  | 0.000000000  |
| 29 | 1.389652000  | 0.000000000  | 0.000000000  |
| 1  | 3.302069000  | 1.518199000  | 0.819746000  |
| 1  | 3.302069000  | 1.518199000  | -0.819746000 |
| 1  | 2.150279000  | 2.350176000  | 0.000000000  |
| 1  | 2.150279000  | -2.350176000 | 0.000000000  |
| 1  | 3.302069000  | -1.518199000 | -0.819746000 |
| 1  | 3.302069000  | -1.518199000 | 0.819746000  |
| 1  | -3.302069000 | -1.518199000 | 0.819746000  |
| 1  | -3.302069000 | -1.518199000 | -0.819746000 |
| 1  | -2.150279000 | -2.350176000 | 0.000000000  |
| 1  | -3.302069000 | 1.518199000  | -0.819746000 |
| 1  | -3.302069000 | 1.518199000  | 0.819746000  |
| 1  | -2.150279000 | 2.350176000  | 0.000000000  |
| 7  | 2.686611000  | 1.474688000  | 0.000000000  |
| 7  | 2.686611000  | -1.474688000 | 0.000000000  |
| 7  | -2.686611000 | -1.474688000 | 0.000000000  |
| 7  | -2.686611000 | 1.474688000  | 0.000000000  |

**(3)-D2h-Triplet**

|    |              |              |              |
|----|--------------|--------------|--------------|
| 8  | 0.000000000  | 1.126844000  | 0.000000000  |
| 8  | 0.000000000  | -1.126844000 | 0.000000000  |
| 29 | -1.438140000 | 0.000000000  | 0.000000000  |
| 29 | 1.438140000  | 0.000000000  | 0.000000000  |
| 1  | 3.347726000  | 1.544957000  | 0.818241000  |
| 1  | 3.347726000  | 1.544957000  | -0.818241000 |
| 1  | 2.202991000  | 2.382679000  | 0.000000000  |
| 1  | 2.202991000  | -2.382679000 | 0.000000000  |
| 1  | 3.347726000  | -1.544957000 | -0.818241000 |
| 1  | 3.347726000  | -1.544957000 | 0.818241000  |
| 1  | -3.347726000 | -1.544957000 | 0.818241000  |
| 1  | -3.347726000 | -1.544957000 | -0.818241000 |
| 1  | -2.202991000 | -2.382679000 | 0.000000000  |
| 1  | -3.347726000 | 1.544957000  | -0.818241000 |
| 1  | -3.347726000 | 1.544957000  | 0.818241000  |
| 1  | -2.202991000 | 2.382679000  | 0.000000000  |
| 7  | 2.731007000  | 1.503466000  | 0.000000000  |
| 7  | 2.731007000  | -1.503466000 | 0.000000000  |
| 7  | -2.731007000 | -1.503466000 | 0.000000000  |
| 7  | -2.731007000 | 1.503466000  | 0.000000000  |
